# Supplementary material for: Identification and Characterization of PSEUDO-RESPONSE REGULATOR (PRR) 1a and 1b Genes by CRISPR/Cas9-Targeted Mutagenesis in Chinese Cabbage (Brassica rapa L.)
Source: MDPI journal article supplement (doi:10.3390/ijms23136963), 2022-06-23
Supplement: s1 [file s1]

Table S1. Mutation frequency of *BrPRR1a*, *BrPRR1b* and *BrPRR1ab* genes using CRISPR/Cas9 system.

| Target region  | Sample             | Total count | Insertion | Deletion | Indel | Indel frequency | Genotype     | Mutation analysis |        |        |        |       |        |       |        |
|----------------|--------------------|-------------|-----------|----------|-------|-----------------|--------------|-------------------|--------|--------|--------|-------|--------|-------|--------|
| BrPRR1a-sgRNA3 | <i>prr1a-g3-1</i>  | 8436        | 0         | 8428     | 8428  | 99.91%          | bi-allelic   | 1 del             | 65.20% | 2 del  | 33.30% |       |        |       |        |
|                | <i>prr1a-g3-2</i>  | 7464        | 568       | 6896     | 7464  | 100.00%         | hetero       | 1 del             | 49.30% | mosaic |        |       |        |       |        |
|                | <i>prr1a-g3-3</i>  | 7035        | 0         | 7035     | 7035  | 100.00%         | mosaic       |                   |        |        |        |       |        |       |        |
|                | <i>prr1a-g3-4</i>  | 6794        | 0         | 6794     | 6794  | 100.00%         | mosaic       |                   |        |        |        |       |        |       |        |
|                | <i>prr1a-g3-5</i>  | 7661        | 0         | 7661     | 7661  | 100.00%         | mosaic       |                   |        |        |        |       |        |       |        |
|                | <i>prr1a-g3-6</i>  | 7594        | 1043      | 6551     | 7594  | 100.00%         | mosaic       |                   |        |        |        |       |        |       |        |
|                | <i>prr1a-g3-7</i>  | 6344        | 0         | 6344     | 6344  | 100.00%         | mosaic       |                   |        |        |        |       |        |       |        |
|                | <i>prr1a-g3-8</i>  | 6976        | 0         | 6976     | 6976  | 100.00%         | mosaic       |                   |        |        |        |       |        |       |        |
|                | <i>prr1a-g3-9</i>  | 5856        | 0         | 5856     | 5856  | 100.00%         | mosaic       |                   |        |        |        |       |        |       |        |
|                | <i>prr1a-g3-10</i> | 7159        | 0         | 7159     | 7159  | 100.00%         | mosaic       |                   |        |        |        |       |        |       |        |
|                | <i>prr1a-g3-11</i> | 7626        | 0         | 7626     | 7626  | 100.00%         | mosaic       |                   |        |        |        |       |        |       |        |
|                | <i>prr1a-g3-12</i> | 7436        | 539       | 6897     | 7436  | 100.00%         | mosaic       |                   |        |        |        |       |        |       |        |
|                | <i>prr1a-g3-13</i> | 7062        | 558       | 6504     | 7062  | 100.00%         | mosaic       |                   |        |        |        |       |        |       |        |
| BrPRR1a-sgRNA4 | <i>prr1a-g4-1</i>  | 8972        | 2959      | 6013     | 8972  | 100.00%         | bi-allelic   | 1 del             | 63.50% | 24 ins | 34.20% |       |        |       |        |
|                | <i>prr1a-g4-2</i>  | 10321       | 0         | 10321    | 10321 | 100.00%         | bi-allelic   | 8 del             | 53.00% | 1 del  | 44.80% |       |        |       |        |
|                | <i>prr1a-g4-3</i>  | 11652       | 0         | 11652    | 11652 | 100.00%         | bi-allelic   | 8 del             | 52.20% | 1del   | 45.90% |       |        |       |        |
|                | <i>prr1a-g4-4</i>  | 10359       | 0         | 10353    | 10353 | 99.94%          | bi-allelic   | 8 del             | 51.90% | 1 del  | 45.90% |       |        |       |        |
|                | <i>prr1a-g4-5</i>  | 8369        | 2844      | 5525     | 8369  | 100.00%         | bi-allelic   | 1 del             | 62.60% | 24 ins | 35.50% |       |        |       |        |
|                | <i>prr1a-g4-6</i>  | 9061        | 3138      | 5923     | 9061  | 100.00%         | bi-allelic   | 1 del             | 61.80% | 24 ins | 35.90% |       |        |       |        |
|                | <i>prr1a-g4-7</i>  | 10651       | 2         | 10649    | 10651 | 100.00%         | bi-allelic   | 8 del             | 50.90% | 1 del  | 46.90% |       |        |       |        |
|                | <i>prr1a-g4-8</i>  | 10917       | 2001      | 8916     | 10917 | 100.00%         | tri-allelic  | 1 del             | 52.80% | 12 del | 27.00% | 1 ins | 18.00% |       |        |
|                | <i>prr1a-g4-9</i>  | 10564       | 0         | 10564    | 10564 | 100.00%         | bi-allelic   | 26 del            | 58.10% | 9 del  | 39.60% |       |        |       |        |
|                | <i>prr1a-g4-10</i> | 10303       | 0         | 10303    | 10303 | 100.00%         | bi-allelic   | 26 del            | 55.70% | 9 del  | 42.00% |       |        |       |        |
|                | <i>prr1a-g4-11</i> | 9916        | 0         | 9916     | 9916  | 100.00%         | bi-allelic   | 26 del            | 57.90% | 9 del  | 39.50% |       |        |       |        |
|                | <i>prr1a-g4-12</i> | 7381        | 3952      | 3424     | 7376  | 99.93%          | Quad-allelic | 1 ins             | 35.30% | 7 del  | 26.40% | 1 del | 19.20% | 1 ins | 17.60% |
|                | <i>prr1a-g4-13</i> | 10180       | 0         | 10180    | 10180 | 100.00%         | bi-allelic   | 26 del            | 59.10% | 9 del  | 38.60% |       |        |       |        |
|                | <i>prr1a-g4-14</i> | 9433        | 2         | 9431     | 9433  | 100.00%         | bi-allelic   | 26 del            | 67.80% | 9 del  | 30.10% |       |        |       |        |
|                | <i>prr1a-g4-15</i> | 7528        | 3589      | 3935     | 7524  | 99.95%          | bi-allelic   | 2 del             | 51.30% | 1 ins  | 46.70% |       |        |       |        |
|                | <i>prr1a-g4-16</i> | 6734        | 3221      | 3511     | 6732  | 99.97%          | bi-allelic   | 2 del             | 51.40% | 1 ins  | 47.10% |       |        |       |        |

Continued

| Target region  | Sample             | Total count | Insertion | Deletion | Indel | Indel frequency | Genotype     | Mutation pattern |        |        |        |       |        |  |  |
|----------------|--------------------|-------------|-----------|----------|-------|-----------------|--------------|------------------|--------|--------|--------|-------|--------|--|--|
| BrPRR1b-sgRNA3 | <i>prrlb-g3-1</i>  | 9903        | 3         | 9898     | 9901  | 99.98%          | homo         | 1 del            | 99.10% |        |        |       |        |  |  |
|                | <i>prrlb-g3-2</i>  | 10586       | 0         | 10584    | 10584 | 99.98%          | homo         | 1 del            | 98.10% |        |        |       |        |  |  |
|                | <i>prrlb-g3-3</i>  | 10074       | 0         | 10072    | 10072 | 99.98%          | bi-allelic   | 5 del            | 49.50% | 7 del  | 48.40% |       |        |  |  |
|                | <i>prrlb-g3-4</i>  | 10069       | 0         | 10069    | 10069 | 100.00%         | bi-allelic   | 5 del            | 48.90% | 7 del  | 48.70% |       |        |  |  |
|                | <i>prrlb-g3-5</i>  | 8573        | 0         | 8569     | 8569  | 99.95%          | bi-allelic   | 7 del            | 49.70% | 5 del  | 48.80% |       |        |  |  |
|                | <i>prrlb-g3-6</i>  | 9467        | 0         | 9467     | 9467  | 100.00%         | bi-allelic   | 5 del            | 49.80% | 7 del  | 48.40% |       |        |  |  |
|                | <i>prrlb-g3-7</i>  | 9447        | 4071      | 5368     | 9439  | 99.92%          | hexa-allelic | 13 del           | 22.40% | 5 del  | 17.80% | 1 del | 15.60% |  |  |
|                |                    |             |           |          |       |                 |              | 1 ins            | 15.10% | 1 ins  | 14.30% | 1 ins | 13.40% |  |  |
|                | <i>prrlb-g3-8</i>  | 7780        | 3176      | 4573     | 7749  | 99.60%          | mosaic       |                  |        |        |        |       |        |  |  |
|                | <i>prrlb-g3-9</i>  | 8373        | 3200      | 5170     | 8370  | 99.96%          | hexa-allelic | 1 ins            | 25.20% | 13 del | 19.50% | 3 del | 14.30% |  |  |
|                |                    |             |           |          |       |                 |              | 1 del            | 14.20% | 1 del  | 13.00% | 1 ins | 12.60% |  |  |
| BrPRR1b-sgRNA4 | <i>prrlb-g3-10</i> | 6337        | 2530      | 3733     | 6263  | 98.83%          | mosaic       |                  |        |        |        |       |        |  |  |
|                | <i>prrlb-g3-11</i> | 9467        | 0         | 9467     | 9467  | 100.00%         | bi-allelic   | 5 del            | 49.80% | 7 del  | 48.40% |       |        |  |  |
|                | <i>prrlb-g4-1</i>  | 6633        | 9         | 3432     | 3441  | 51.88%          | hetero       | 1 del            | 50.80% |        |        |       |        |  |  |
|                | <i>prrlb-g4-2</i>  | 6289        | 6268      | 2        | 6270  | 99.70%          | bi-allelic   | 1 ins            | 50.70% | 1 ins  | 47.60% |       |        |  |  |
|                | <i>prrlb-g4-3</i>  | 6733        | 4415      | 2310     | 6725  | 99.88%          | tri-allelic  | 1 ins            | 43.20% | 1 del  | 33.70% | 1 ins | 21.45% |  |  |
|                | <i>prrlb-g4-4</i>  | 6504        | 0         | 6502     | 6502  | 99.97%          | bi-allelic   | 21 del           | 49.30% | 9 del  | 48.70% |       |        |  |  |
|                | <i>prrlb-g4-5</i>  | 10358       | 10346     | 2        | 10348 | 99.90%          | bi-allelic   | 1 ins            | 49.20% | 1 ins  | 49.20% |       |        |  |  |
|                | <i>prrlb-g4-6</i>  | 12878       | 6238      | 6636     | 12874 | 99.97%          | bi-allelic   | 1 del            | 50.50% | 2 ins  | 47.80% |       |        |  |  |
|                | <i>prrlb-g4-7</i>  | 11300       | 5545      | 4        | 5549  | 49.11%          | hetero       | 1 ins            | 48.50% |        |        |       |        |  |  |
|                | <i>prrlb-g4-8</i>  | 8103        | 0         | 8093     | 8093  | 99.88%          | bi-allelic   | 21 del           | 54.20% | 7 del  | 44.00% |       |        |  |  |
|                | <i>prrlb-g4-9</i>  | 8283        | 0         | 8283     | 8283  | 100.00%         | bi-allelic   | 21 del           | 56.20% | 7 del  | 42.10% |       |        |  |  |
|                | <i>prrlb-g4-10</i> | 7291        | 623       | 6668     | 7291  | 100.00%         | mosaic       |                  |        |        |        |       |        |  |  |
|                | <i>prrlb-g4-11</i> | 4732        | 1967      | 2765     | 4732  | 100.00%         | mosaic       |                  |        |        |        |       |        |  |  |
|                | <i>prrlb-g4-12</i> | 4341        | 431       | 3910     | 4341  | 100.00%         | mosaic       |                  |        |        |        |       |        |  |  |
|                | <i>prrlb-g4-13</i> | 6504        | 0         | 6502     | 6502  | 99.97%          | bi-allelic   | 21 del           | 49.30% | 9 del  | 48.70% |       |        |  |  |

Continued

| Target region   | Sample              | Total count | Insertion | Deletion | Indel | Indel frequency | Genotype    | Mutation pattern |        |        |        |       |        |
|-----------------|---------------------|-------------|-----------|----------|-------|-----------------|-------------|------------------|--------|--------|--------|-------|--------|
| BrPRR1ab-sgRNA2 | <i>prrlab-g2-1</i>  | 5908        | 3702      | 2201     | 5903  | 99.92%          | bi-allelic  | 1 ins            | 61.30% | 5 del  | 36.90% |       |        |
|                 | <i>prrlab-g2-2</i>  | 6429        | 6417      | 5        | 6422  | 99.89%          | homo        | 1 ins            | 98.50% |        |        |       |        |
|                 | <i>prrlab-g2-3</i>  | 7552        | 4424      | 3124     | 7548  | 99.95%          | bi-allelic  | 1 ins            | 58.10% | 5 del  | 41.00% |       |        |
|                 | <i>prrlab-g2-4</i>  | 7363        | 4341      | 3015     | 7356  | 99.90%          | bi-allelic  | 1 ins            | 58.10% | 5 del  | 40.50% |       |        |
|                 | <i>prrlab-g2-5</i>  | 7542        | 4340      | 3188     | 7528  | 99.81%          | bi-allelic  | 1 ins            | 56.80% | 5 del  | 41.60% |       |        |
|                 | <i>prrlab-g2-6</i>  | 6818        | 3864      | 2949     | 6813  | 99.93%          | bi-allelic  | 1 ins            | 56.10% | 5 del  | 42.80% |       |        |
|                 | <i>prrlab-g2-7</i>  | 1206        | 804       | 303      | 1107  | 91.79%          | hetero      | 1 ins            | 52.30% |        |        |       |        |
|                 | <i>prrlab-g2-8</i>  | 2915        | 1464      | 24       | 1488  | 51.05%          | hetero      | 1 ins            | 49.50% |        |        |       |        |
|                 | <i>prrlab-g2-9</i>  | 11319       | 3397      | 7908     | 11305 | 99.88%          | tri-allelic | 2 del            | 36.70% | 1 del  | 32.10% | 1 ins | 29.60% |
| BrPRR1ab-sgRNA3 | <i>prrlab-g3-1</i>  | 10773       | 26        | 6546     | 6572  | 61.00%          | hetero      | 14 del           | 35.70% |        |        |       |        |
|                 | <i>prrlab-g3-2</i>  | 10969       | 4507      | 4052     | 8559  | 78.03%          | hetero      | 1 ins            | 40.10% |        |        |       |        |
|                 | <i>prrlab-g3-3</i>  | 11992       | 6186      | 0        | 6186  | 51.58%          | hetero      | 1 ins            | 50.40% |        |        |       |        |
|                 | <i>prrlab-g3-4</i>  | 9181        | 4354      | 4710     | 9064  | 98.73%          | mosaic      | 10 del           | 37.00% |        |        |       |        |
|                 | <i>prrlab-g3-5</i>  | 8555        | 3567      | 2798     | 6365  | 74.40%          | hetero      | 1 ins            | 39.80% |        |        |       |        |
|                 | <i>prrlab-g3-6</i>  | 9095        | 3723      | 5363     | 9086  | 99.90%          | tri-allelic | 1 ins            | 39.90% | 14 del | 33.40% | 6 del | 24.60% |
|                 | <i>prrlab-g3-7</i>  | 9642        | 4194      | 5446     | 9640  | 99.98%          | tri-allelic | 1 ins            | 42.20% | 14 del | 31.20% | 6 del | 24.30% |
|                 | <i>prrlab-g3-8</i>  | 10980       | 41        | 4240     | 4281  | 39.0%           | mixed       |                  |        |        |        |       |        |
|                 | <i>prrlab-g3-9</i>  | 9379        | 4292      | 1797     | 6089  | 64.92%          | hetero      | 1 ins            | 42.90% |        |        |       |        |
|                 | <i>prrlab-g3-10</i> | 1468        | 31        | 542      | 573   | 39.03%          | mixed       |                  |        |        |        |       |        |
|                 | <i>prrlab-g3-11</i> | 1572        | 238       | 875      | 1113  | 70.80%          | mixed       | 12 del           | 32.70% |        |        |       |        |
|                 | <i>prrlab-g3-12</i> | 1107        | 546       | 465      | 1011  | 91.33%          | mixed       | 1 ins            | 49.80% | 14 del | 24.60% |       |        |
|                 | <i>prrlab-g3-13</i> | 716         | 640       | 71       | 711   | 99.30%          | mixed       | 1 ins            | 41.30% | 1 ins  | 33.40% |       |        |

**Table S2.** Predicted Off-target sites of each guide RNA in *B. rapa* genome using Cas-OFFinder (<http://www.rgenome.net/cas-offfinder/>) used in this study.

| Label                  | Sequences               | Predicted off-target sites |   |   |    |          |
|------------------------|-------------------------|----------------------------|---|---|----|----------|
|                        |                         | 1                          | 2 | 3 | 4  | mismatch |
| <b>BrPRR1a-sgRNA3</b>  | GCCTGACATCGATATAATACTGG | 0                          | 0 | 0 | 0  |          |
| <b>BrPRR1a-sgRNA4</b>  | GAGGCAAGACGAGGTCCCTGTGG | 0                          | 0 | 0 | 3  |          |
| <b>BrPRR1b-sgRNA3</b>  | CATCTTCATACCCTTGGCCATGG | 0                          | 0 | 1 | 12 |          |
| <b>BrPRR1b-sgRNA4</b>  | AGGTCCTCTCAGCGGGTTGGTGG | 0                          | 0 | 0 | 4  |          |
| <b>BrPRR1ab-sgRNA2</b> | ATAAGAACACTGTGAAAGGAGGG | 0                          | 0 | 2 | 22 |          |
| <b>BrPRR1ab-sgRNA3</b> | CTTGATAAGAACACTGTGAAAGG | 0                          | 0 | 2 | 21 |          |

**Table S3.** Sequences and position of predicted off-target sites with 3 bp mismatch.

| Label                | Sequences                                                             | Position in genome |          | Direction |
|----------------------|-----------------------------------------------------------------------|--------------------|----------|-----------|
| BrPRR1b-sgRNA3-off1  | CATCTTCATACC <del>aa</del> <u>TGGCC</u> <del>t</del> TGG              | A06                | 2820332  | -         |
| BrPRR1ab-sgRNA2-off1 | ATAA <del>c</del> AACAa <u>TGTGAAAGG</u> <del>g</del> TGG             | A09                | 28541205 | +         |
| BrPRR1ab-sgRNA2-off2 | A <del>a</del> AAGAACA <del>t</del> <u>TGTGAAAG</u> <del>a</del> AAGG | A09                | 35155954 | -         |
| BrPRR1ab-sgRNA3-off1 | CTTG <del>c</del> TAAGAA <u>CACTGT</u> <del>tt</del> AAGG             | A01                | 19835080 | +         |
| BrPRR1ab-sgRNA3-off2 | <del>a</del> TTGA <del>g</del> AAGAA <u>CACTGT</u> <del>t</del> AAAGG | A08                | 10887388 | -         |

Red low letters represented mismatch with gRNA and underbar showed seed region of gRNA.

**Table S4.** List of primers used in this study

| Primer name       | DNA sequence (5'-3')                                         | Purpose                  |
|-------------------|--------------------------------------------------------------|--------------------------|
| β-actin F         | TGGCATCACACTTTTCTACAA                                        | RT-qPCR                  |
| β-actin R         | CAACGGAATCTCTCAGCTCC                                         |                          |
| BrCCA1 F          | TCTCTGTCACATGCTCCTCCTT                                       |                          |
| BrCCA1 R          | CGGCTAAGTTCCTTGTGG                                           |                          |
| BrLHYa F          | AGACATTCATGGAATCTTCTG                                        |                          |
| BrLHYa R          | GCGGTAATCATGCTGGAAAG                                         |                          |
| BrLHYb F          | CTGTATGCGCTCCTCTGCT                                          |                          |
| BrLHYb R          | TTGTCTTTGAGCCAGCGTTG                                         |                          |
| 1a-sgRNA4 1st F   | GTTTGAGCTGCTATCGATTGTT                                       | Targeted deep-sequencing |
| 1a-sgRNA4 1st R   | AAGCATTGAGCGCAAATAAG                                         |                          |
| 1a-sgRNA4 2nd F   | ACACTCTTTCCCTACACGAC GCTCTTCCGATCT CATTACTTTTCTCTACTTAGCAAAG |                          |
| 1a-sgRNA4 2nd R   | GTGACTGGAGTTCAGACGTGT GCTCTTCCGATCT GCATAGAGAGAACTAAAGATAGA  |                          |
| 1b-sgRNA3 1st F   | AATGCATATGTAGTGTCTATTGCA                                     | Targeted deep-sequencing |
| 1b-sgRNA3 1st R   | TAGCATTCACAGCAACAAAGCT                                       |                          |
| 1b-sgRNA3 2nd F   | ACACTCTTTCCCTACACGAC GCTCTTCCGATCT CTTGAAACGCAGTGACTTCAG     |                          |
| 1b-sgRNA3 2nd R   | GTGACTGGAGTTCAGACGTGT GCTCTTCCGATCT CTAAGGAAATGATCATGCTGTC   |                          |
| 1b-sgRNA4 1st F   | AATGCATATGTAGTGTCTATTGCA                                     |                          |
| 1b-sgRNA4 1st R   | TAGCATTCAGCAACAAAGCT                                         |                          |
| 1b-sgRNA4 2nd F   | ACACTCTTTCCCTACACGAC GCTCTTCCGATCT TTTGATCTTGTGCCATCTGATC    |                          |
| 1b-sgRNA4 2nd R   | GTGACTGGAGTTCAGACGTGT GCTCTTCCGATCT CTGTTAGTGTCTGCTGCTA      |                          |
| 1ab-sgRNA3 1st F1 | GTTTGAGCTGCTATCGATTGTT                                       | Targeted deep-sequencing |
| 1ab-sgRNA3 1st F2 | GTTTGAGCTGCTATCGATTGTT                                       |                          |
| 1ab-sgRNA3 1st R1 | AAGCATTGAGCGCAAATAAG                                         |                          |
| 1ab-sgRNA3 1st R2 | AAGCATTGAGCGCAAATAAG                                         |                          |
| 1ab-sgRNA3 2nd F1 | ACACTCTTTCCCTACACGAC GCTCTTCCGATCT TTTGATCTTGTGGGATCTGATC    |                          |
| 1ab-sgRNA3 2nd F2 | GTGACTGGAGTTCAGACGTGT GCTCTTCCGATCT TTTGATCTTGTGGGATCTGATC   |                          |
| 1ab-sgRNA3 2nd R1 | ACACTCTTTCCCTACACGAC GCTCTTCCGATCT GAGTATTGTGGATGGCTGTTT     |                          |
| 1ab-sgRNA3 2nd R2 | GTGACTGGAGTTCAGACGTGT GCTCTTCCGATCT GAGTATTGTGGATGGCTGTTT    |                          |
