# Supplementary material for: Identification and Characterization of PSEUDO-RESPONSE REGULATOR (PRR) 1a and 1b Genes by CRISPR/Cas9-Targeted Mutagenesis in Chinese Cabbage (Brassica rapa L.)
Source: MDPI journal article supplement (doi:10.3390/ijms23136963), 2022-06-23
Supplement: s1 [file s1]

## Supplementary Materials:

(A)

```
TOC1      1  ATGGATTGAACGGTGAGTGTAAAGGAGGAG-----ATGGGTTTATTGATAGAAGCAGAGTCAGGATTTTGCTTTGTGACAAATGATCCACGAGTTGGGAGAGGTTTTTACTCTCCTT
BrPRR1b   1  ATGGATTGAACGGTGAGTGTAAAGGAGGAG-----ATGGGTTTATTGACAGAAGCAGAGTTAGGATTTGCTTTGTGACAAATGATCCACGAGCTGGGAGATGTTTTACCCCTCCTT
BrPRR1a    1  ATGGATTGAACGGAGAGTGTAAAGGAGGAGGAGATGGGTTTATTGACAGAAGCAGAGTTAGGATTTGCTTTGTGACAAATGATCCCAATAGCTTGGGAGAGGTTTTACCCCTCCTT
*****
*****

TOC1      121 TCACAGTGTCTTATCAAGTGACTGCAATGAAATCAGCAAGGCAGGTGATGATGCACTTAATGCAGAGGGACCTGATATCGATATAATACTGGCGAAATGATCTCCCAATGGCTAAG
BrPRR1b    121 TCACAGTGTCTTATCAAGTGACTGCAATGAAATCAGCAAGGCAGGTGATGATGCACTTAATGCAGAGGGACCTGATATCGATATAATACTGGCGAAATGATCTCCCAATGGCTAAG
BrPRR1a    121 TCACAGTGTCTTATCAAGTGACTGCAATGAAATCAGCAAGGCAGGTGATGATGCACTTAATGCAGAGGGACCTGATATCGATATAATACTGGCGAGATTGATCTCCCAATGGCTAAG
***
*****

TOC1      241 GGTATGAAGATGCTGAGGTACATCACACGAGACAAAGATCTTCGCAAGATCCCTGTGATATGATGTCGAGGCAAGACGAGTACCTGCTGCTGTAAGTGTGTAAGCTAGGTGCAGCT
BrPRR1b    241 GGTATGAAGATGCTGAGGTACATCACACGAGTACGCAAGATCTTCGCAAGATCCCTGTGATATGATGTCGAGGCAAGACGAGTACCTGCTGCTGTAAGTGTGTAAGCTAGGTGCAGCT
BrPRR1a    241 GGTATGAAGATGCTAAGGTACATCACACGAGTACGCAAGATCTTCGCAAGATCCCTGTGATATGATGTCGAGGCAAGACGAGTACCTGCTGCTGTAAGTGTGTAAGCTAGGTGCAGCT
*****
*****

TOC1      361 GACTACCTTGTGAAGCCTCTTCGCACCAACGAGCTTCTGAACCTTGTGGACACACATGTGGAGAAGAGCGCATGCTAGGACTTGCTGAGAAATATGTTGAGCTATGATTTTATCTT
BrPRR1b    361 GACTACCTTGTGAAGCCTCTTCGCACCAACGAGCTTCTGAACCTTGTGGACACACATGTGGAGAAGAGCGCATGCTAGGACTTGCTGAGAAATATGTTGAGCTATGATTTTATCTT
BrPRR1a    361 GACTACCTTGTGAAGCCTCTTCGCACCAACGAGCTTCTGAACCTTGTGGACACACATGTGGAGAAGAGCGCATGCTAGGACTTGCTGAGAAATATGTTGAGCTATGATTTTATCTT
*****
*****

TOC1      481 GTGGGATCTGATCAAAAGTATCCAAACACAAATAGTACCAACCTGTTCTCTGACGACAGATGATAGAAGTCTTAGTCCACCAACCAAGAGAGAAATTAAGTCAACGAGGAAAT
BrPRR1b    481 GTGGGATCTGATCAAAAGTATCCAAACACAAAGTATCCAAACCTGTTCTCTGATGACACTGATGACAGAGTATCAGGTCCACCAACCCGCTGAGAGGACCTTTAAGCCGTCAGGAAAAA
BrPRR1a    481 GTGGGATCTGATCAAAAGTATCCAAATACAAACAGCACCAACCTGTTCTCTGATGACAGATGAGAGAAGTATTAGTCCACCAATCCGAGAGAG-----GAAGTCATCAGGAAAG
*****
*****

TOC1      501 GAGTGGTCTGTGCTACTGCTCTGTTCAATGCTGCTGATGGTGGTCTGGTCTGATGGAACAGCCACTTCTCTCTGCTGTTACTGCTGCTATAGAGCCTCCATTGGATCATCTTCTGCTGG
BrPRR1b    501 GAGTGGTCTGTGCTACTGCTCTGTTCAATGCTGCTGATGGTGGTCTGGTCTGATGGAACAGCCACTTCTCTCTGCTGTTACTGCTGCTGCTATAGAGCCTCCATTGGATCATCTTCTGCTGG
BrPRR1a    501 GAGTGGTCTGTGCTACTGCTCTGTTCAATGCTGCTGATGGTGGTCTGGTCTGATGGAACAGCCACTTCTCTCTGCTGTTACTGCTGCTGCTATAGAGCCTCCATTGGATCATCTTCTGCTGG
*****
*****

TOC1      621 TCTCACCATGAGCCAAATGAAAGAAATAGTAAATCCAGCGCAATTTTCTCAGCAGCGAAGAAAGATAGATTGAAGATCGGAGAGTCTCTGCTTTCTTTACATATGTCAAATCTACTGTG
BrPRR1b    621 TCTCACCATGAGCCAAATGAAAGAAATAGTAAATCCAGCGCAATTTTCTCAGTCCCAAGAGAGTATGAAAGATTGGAGAGTCTCTCAGCTTTCTTTACATATGTCAAATCTACTGTG
BrPRR1a    621 CCTCACCATGAGCCTACCAAGAAATATGAAATCCAGCGCAATTTTCTCAGTACCAAGAGAGTATGAAAGATTGGAGAGTCTCTCAGCTTTCTTTACATATGTCAAATCTACTGTG
*****
*****

TOC1      741 CTTAGAACTAACGGTCAGGATCCTCCTCTGTCGATGGAATGGCTCACTTCATCTTCATCGGGGTTGGCGGAGAGTTTCAAGTGGTGGCTAGTGAAGGGATCAACAACACCAACAA
BrPRR1b    741 CTGGCTACCAACTGTCAAGATCCTCCCATGTCAATGGAACGGCTCACTTCATCTTCATCGGGTGTG-----GTCAATGGAATGGCTCACTTCATCTTCATCGGGGTTGGCGGAGAGTTTCAAGTGGT
BrPRR1a    741 -----GTCAATGGAATGGCTCACTTCATCGGGTGTG-----
*****
*****

TOC1      861 GCACGCAGAGCAACACCAAAATCTACTGCTCTAGAACTAACGGTCAGGATCCTCCTCTTGTCAATGGAATGGCTCACATCATCTTCATCGGGGTTGGCGGAGAAAGTTTCAAGTGGT
BrPRR1b    861 -----GTTGCGGAGAGCTTCAAGTGGT
BrPRR1a    861 -----GCTGAGAGCTTCAAGCGGTG
*****
*****

TOC1      981 GCTAGTGAAGGATCAACAACCAACCAAGCACAGAACTAGAGGGACCGAGCAATACCATTTCTCAAGGAGAGACCTTGCAGAAATGGCCGACGATATCCACATTCCTTGAAGCGGTCA
BrPRR1b    981 GCGAGTGAAGTCAATCAACAAGCCCAAGCAACACACAGCAAGAGACTAG-----AAAACCTTACAGAAATGGCGCG-----
BrPRR1a    981 GCAAGTGAAGTCAATCAACAAGCCCAACCAACAGCAGGAGGTAGAGAGTACAGAAAAAAGCTCAAGGAGAGAACTTACTGAACCGCACGCTTG-----AGCGGTCA
*****
*****

TOC1      1001 CGCACGCTTCCACATCAATGGAATCTCATG---GTAGAACTACCAAGAGS-----GCAATATGAATATT
BrPRR1b    1001 -----CCAGGAAGAACTTCATG---GTAGAGTTACCAAGAG-----AGG
BrPRR1a    1001 CGCACGCTTCCAAACCAATGGAATCTCATGCGAGTAGGAGTTACCAAGAACTTCAAAATTCATATGAGCGGTACGACGCTTCCACCAACCAATGGAATCTACGCTACTAGGAGTTGT
*****
*****

TOC1      1121 CCCCAAGTTG---CTATGAACAGAAATTAAGATTCTGCTCAAGTTGATGATCGGGTTTCTGCAACCAATGCCTATCTTACTATATGATGGGTCATGAACCAAGTTATGATGCAA
BrPRR1b    1121 AATCAGGTG---CTGTGAACAGAAATTAAGATTCTATCTCAAGTT-----GCCTATCTTACTATATGCAAGGGTCATGAACCAAGTTATGATGCAA
BrPRR1a    1121 TACCAAGAGGATCTATGATGATGCGCGGGTTGCTGCTGCTCAAGGATTCATCTCAGTTCCTGCGCAAAATGCCTATCTTACTATATGATGCTGATGAACCAAGTTATGATGCAA
*****
*****

TOC1      1141 TCAGCAGCATGATGCTCAATATG---GTACATAATTCCTCATTGCCAACCAATCATCCGAATGGAATGACGGGATATCCT---TACTACCAACCCCAAT---GAACACATCTTTG
BrPRR1b    1141 TCAGCAGCATGATGCTCAGTATGCTCATCATCAATCCTCATTACCCACCTTAATCATCTCAATGGAATGACAGGAGTCTTATTAACCAACCATCCCAT---GAACACACCTTA
BrPRR1a    1141 TCAGCAGCATGATGCTCAGTATGCTCATCATCAATCCTCATTGCCCGCTTAATCATCTCAATGGAATGACAGGAGTTCTTATTAACCAACCAACCATGATGACATCTGTTA
*****
*****

TOC1      1261 CAGCATAGTCAGATGCTTTACAGAATGGTCAGATG---TCTATGGTTCATCTTCTGGTCACCGGCAGGA-----AATCCGCTTCTAATGAGGTGAGGTAAATAAATTTGAC
BrPRR1b    1261 CAGCACAATCAATG---TCAAGAAATGGTCAGATG---TCTATGGTTCATTAT-----CATCCGTCATCTAACGAGGTGAGAGCGGATGAACCTTTGAC
BrPRR1a    1261 CAGAAGCGTCATGTCCTTACAGAATGGTCAGATGCTCCTATGTTTCATCATCATCTTCTGGCCACAGGTGGGAACCAACCGCTCTCCTAACGAGGTGAGGTGACTAAGCTTTGAC
*****
*****

TOC1      1381 AGAAGAGAGGAAGCTCTGCTGAAATTCAGACGTAAGGAACCAACAGTGTGTTTGTATAAGAAGATTAGGTATGTGAATAGGAAGCGCTTCTGCTGAGAGGAGACCCCGGTTAAGGGTCAG
BrPRR1b    1381 AGAAGAGAGGAAGCTTTGCTTAAATTTAGACGTAAGAGGAACCAAGGTGTTTGTATAAGAAGATTAGGTATGTGAATAGGAAGAGCTCGCTGAGAGGAGCCGCTGTTAAGGGTCAG
BrPRR1a    1381 AGAAGAGAGGAAGCGTTGCTTAAATTTAGACGTAAGAGGAACCAAGGTGTTTGTATAAGAAGATTAGGTATGTGAATAGGAAGAGCTTCTGCTGAGAGGAGCCAGCTGTTAAGGGTCAG
*****
*****

TOC1      1501 TTTGTTAGGAAGATGAACGGCGTGAATGTTGATTAAATGGACAGCTGACTCT-----GCTGACTATGATGACGAGGAAGAGGAGGAAGAAGAAGAGAGGAGAACCCGGGATTCA
BrPRR1b    1501 TTTGTTAGGAAGATGAACGGGTGAATGTTGACTTAAATGGGAGCCT-----GACTATGATGACGAGGAAGAGGAGGAGGATGAAGAGGAAGAGGAGGAATAGGGACTCA
BrPRR1a    1501 TTTGTTAGGAAGATGAACGGCGTAAATGTTGACTTGAACGGGAGCCTGAACCTGACTCTGCTGACTATGATGACGAGGAAGAGGAG---GATGAAGAAGAGAGGAGATCGGACTCG
*****
*****

TOC1      1621 TCTCCTCAGGATGATGCTTTGGGAACCTGA
BrPRR1b    1621 TCTCCTCAGGATGATGCTCAGGGAACCTGA
BrPRR1a    1621 TCTCCTCAGGATGATGCTTTGGGACTGA
*****
*****
```

(B)

|         | Pseudo-Receiver                                                                     | E |     |
|---------|-------------------------------------------------------------------------------------|---|-----|
| APRR1   | MDLNGECKGG--DGFIDRSRVRLLCDNDSTSLGEVFTLLSECSYQVTAVKSARQVIDALNAEGPDIDILAEIDLPMK       |   | 78  |
| BrPRR1a | MDLNGECKGGGDGFIDRSRVRLLCDNDENSLGEVFTLLSQCSYQVTSVKSARQVIDALNAEGPDIDILAEIDLPMK        |   | 80  |
| BrPRR1b | MDLNGECKGG--DGFIDRSRVRLLCDNDSSKSLGDVFTLLSQCSYQVTSVKSARQVIDALNAEGPDIDILAEIDLPMK      |   | 78  |
| APRR1   | GMKMLRYITRDKDLRRIPVIMMSRQDEVVVVKCLKLGAAADYLVKPLRTNELLNLWTHMWRRRRMLGLAEKNMLSYDFDI    |   | 158 |
| BrPRR1a | GMKMLRYITRDKDLRRIPVIMMSRQDEVVVVKCLKLGAAADYLVKPLRTNELLNLWTHMWRRRRMLGLAEKNMLSYDFDI    |   | 160 |
| BrPRR1b | GMKMLRYITRDKDLRRIPVIMMSRQDEVVVVKCLKLGAAADYLVKPLRTNELLNLWTHMWRRRRMLGLAEKNMLSYDFDI    |   | 158 |
| APRR1   | VGSDSDPNTNSTNLFSDDDTDRSLRSTNPORGNLSHQENESVATAPVHARDGGLGADGTATSSSLAVTATEPPLDHLAC     |   | 238 |
| BrPRR1a | VGSDSDPNTNSTNLFSDDDTDRSIRSTNPORC--SHQEKWVPVPTGSCVCGDC--AADGTATSTPPVATIEPPLNHLPE     |   | 236 |
| BrPRR1b | VGSDSDPNTNSTNLFSDDDTDRSIRSTNPLRCPLSRQEKECPAATGGSV-----DGTATSA-----PPLNHLPG          |   | 223 |
| APRR1   | SHHEPMKRNSNPQOFSSAPKKSRLKIGESSAFFTYVKSTVLRITNGQDPPLVDGNGSLHLHRL--AEKFOVVASEGINNTK   |   | 317 |
| BrPRR1a | PHHEPTKRNTNPQOFSSVPKKSRLKIGESSAFFTYVKSTV-----NGNGSVH--PGM--AEKLOAVASEVINNAK         |   | 302 |
| BrPRR1b | SHHEP-----NPEKFSSVPKKSRLKIGESSAFFTYVKSTALATNQCDDPHVNGNGSLHLHPGVVAEKLQVVASEVINKPK    |   | 298 |
| APRR1   | QAR--RATPKSTVLRITNGQDPPLVNGNGSHH--HGAAEKFOVVASEGINNTKQAHRSRCTEQYHSQGETLQNGASYPHSI   |   | 395 |
| BrPRR1a | QTEGGRETEKN--KAQGEN--LVNGT--LER--SRTLEPTMELHGSRSYQEV--PNSI                          |   | 350 |
| BrPRR1b | QTHRSRETEKNLQNGGATE-----                                                            |   | 317 |
| APRR1   | ERSRTLEPTSMESHG--RN--YQEGNMNIPQVAMNRSKDSSQVDGSGESAPNAYPYMHGVMNQVMQSAAMMPQYGH--QIPH  |   | 472 |
| BrPRR1a | ERSRTLEPTPELHGTRSCYQEGSMDDARVAA--AKDSSQ--EPQONAYPYMHGVMNQVMQSAAMMPQYGHQHHPH         |   | 423 |
| BrPRR1b | -----ELHG--RS--YQERN--QVAVNRSKDSSQV-----AYPYMHGVMNQVMQSAAMMPQYGHQHHPH               |   | 372 |
|         | CONSTANS-Motif                                                                      |   |     |
| APRR1   | CQPNHPLNGMTGVPYYHH--PMNTSLQHSQMSLQNGQMS--MVHH--SWSPAGNDPS--NEVRVNKLDREAEALLKFRKRKNQ |   | 546 |
| BrPRR1a | CPPNHPLNGMTGVPYYHH--PMNTSLQGHVPLQNGQMPMVHHHSWPQVGNHPSNEVRVTKLDREAEALLKFRKRKNQ       |   | 503 |
| BrPRR1b | YPPNHPLNGMTGVPYYHH--PMNTPLQHNQMS--QNGQMS--MVHY-----HPSSEVRASKLDREAEALLKFRKRKNQ      |   | 440 |
| APRR1   | RCFDKKIRYVNRKRLAERRPRVKGQFVRKMGVNVDLNGQPE--DSADYDDEEEEEEEEEENRDSSPQDDALGT-----      |   | 618 |
| BrPRR1a | RCFDKKIRYVNRKRLAERRPRVKGQFVRKMGVNVDLNGQPEPDSADYDDEEEEEEEEEENRDSSPQDDALGT-----       |   | 576 |
| BrPRR1b | RCFDKKIRYVNRKRLAERRPR-----PDYDDEEEEEEEEEENRDSSPQDDAAGT-----                         |   | 490 |

**Figure S1.** Comparison of *Arabidopsis* *PRR1* and its *B. rapa* orthologs *BrPRR1a* and *BrPRR1b*. Alignment of mRNA (A) and amino acid sequences [28] (B).

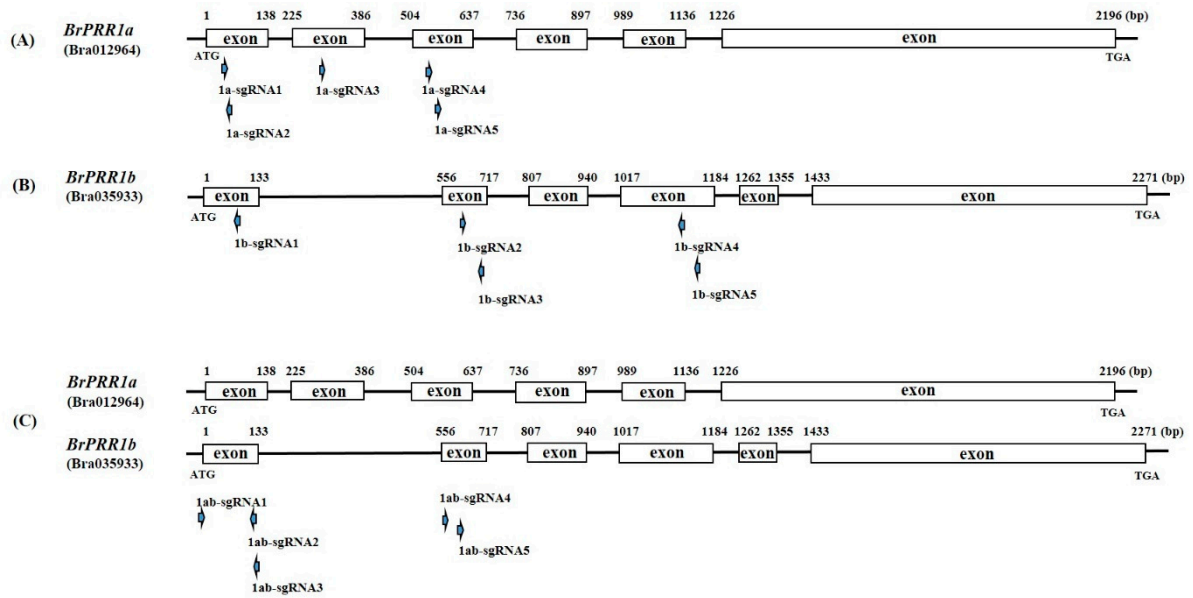

**Figure S2.** Schematic maps of the sgRNA target sites of *BrPRR1a* and *BrPRR1b* in *B.rapa* genome. Arrows show the positions of sgRNA target site for *BrPRR1a* (A), *BrPRR1b* (B), and *BrPRR1a* and *BrPRR1b* double mutations (C).

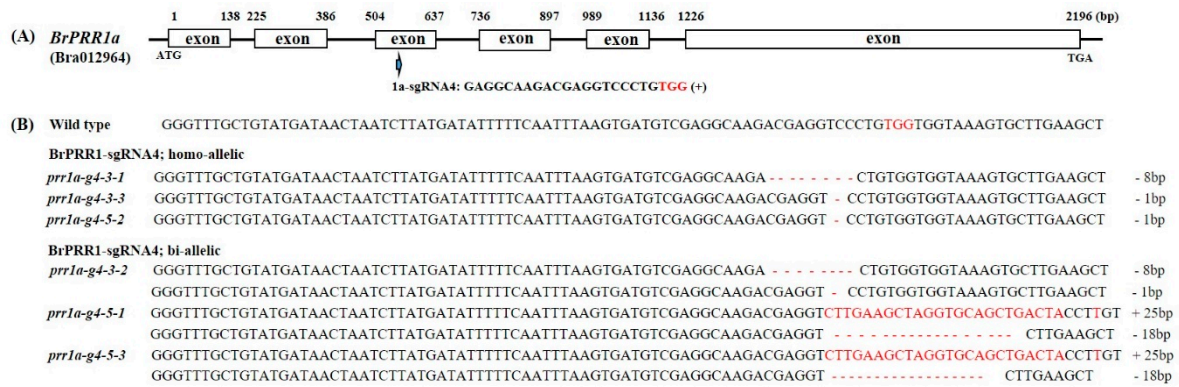

**Figure S3.** Genome editing of the Chinese cabbage *BrPRR1a* gene. Design of sgRNA site for *BrPRR1a* exons. The PAM motif (NGG) is shown in red (A). Next-generation sequencing (NGS) alignment of the sgRNA target region in different mutant lines. Deletions and insertions are indicated by dashes and red letters, respectively (B).

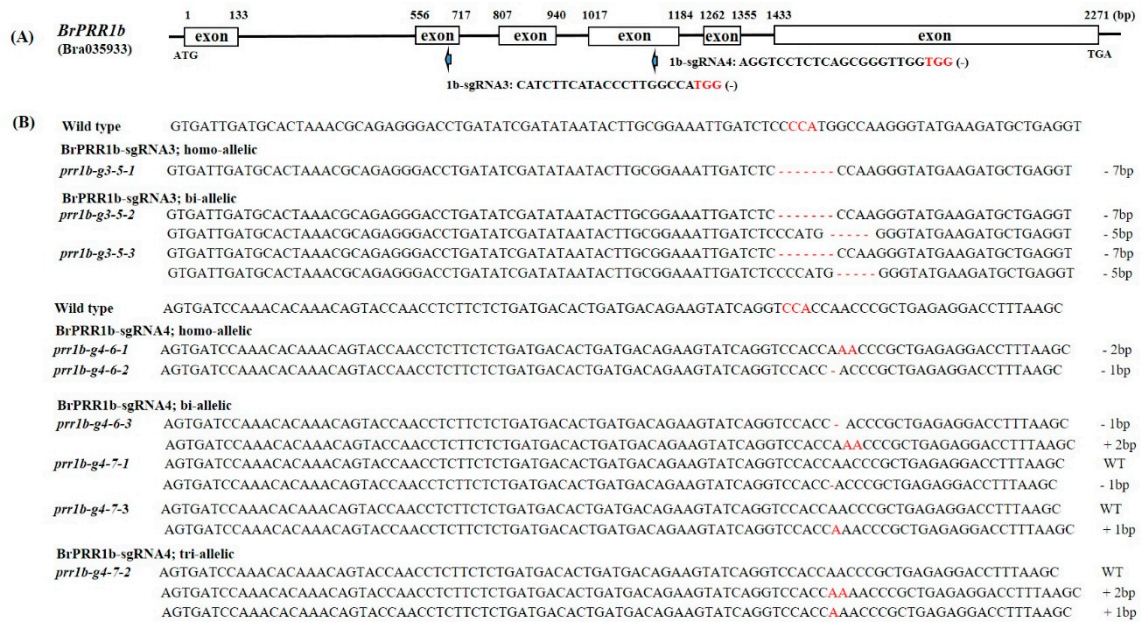

**Figure S4.** Genome editing of the Chinese cabbage *BrPRR1b* gene. Design of sgRNA sites for *BrPRR1b* exons. The PAM motif (NGG) is shown in red (A). Next-generation sequencing (NGS) alignment of the sgRNA target region in different mutant lines. Deletions and insertions are indicated by dashes and red letters, respectively (B).

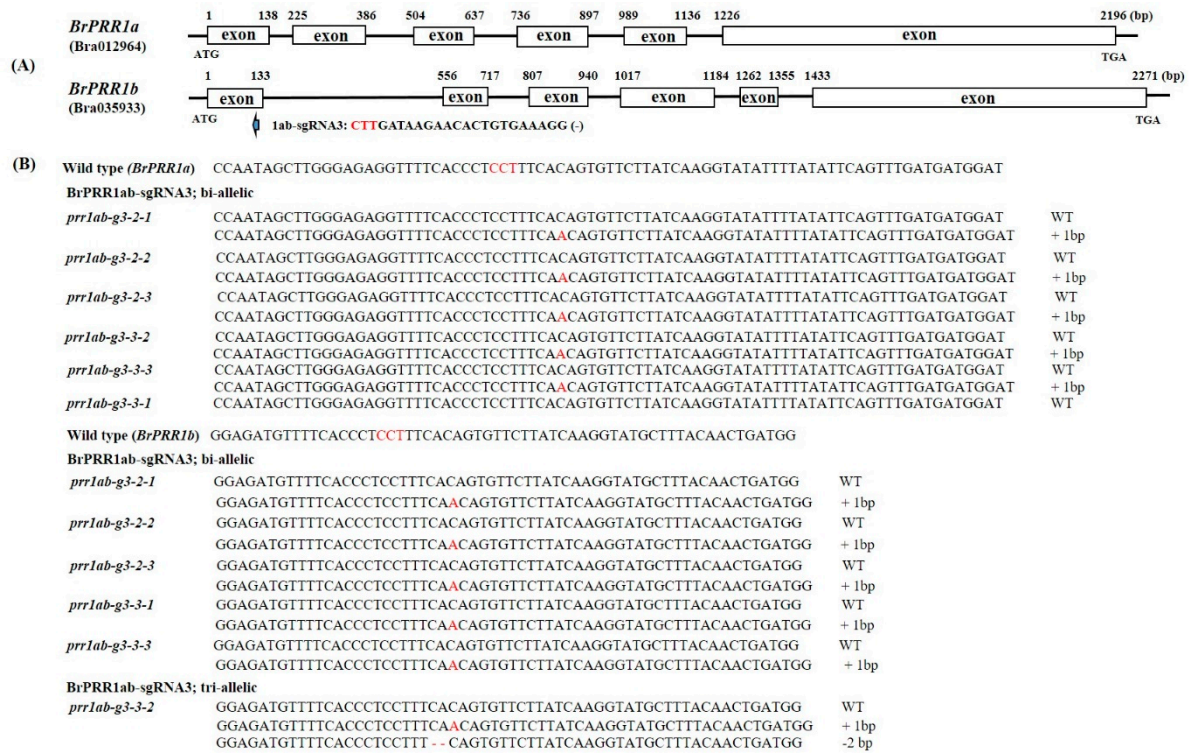

**Figure S5.** Genome editing of the Chinese cabbage *BrPRR1a* and *1b* genes. Design of sgRNA site for *BrPRR1a* and *1b* exons. The PAM motif (NGG) is shown in red (A). NGS alignment of the sgRNA target region in different mutant lines. Deletions and insertions are indicated by dashes and red letters, respectively (B).



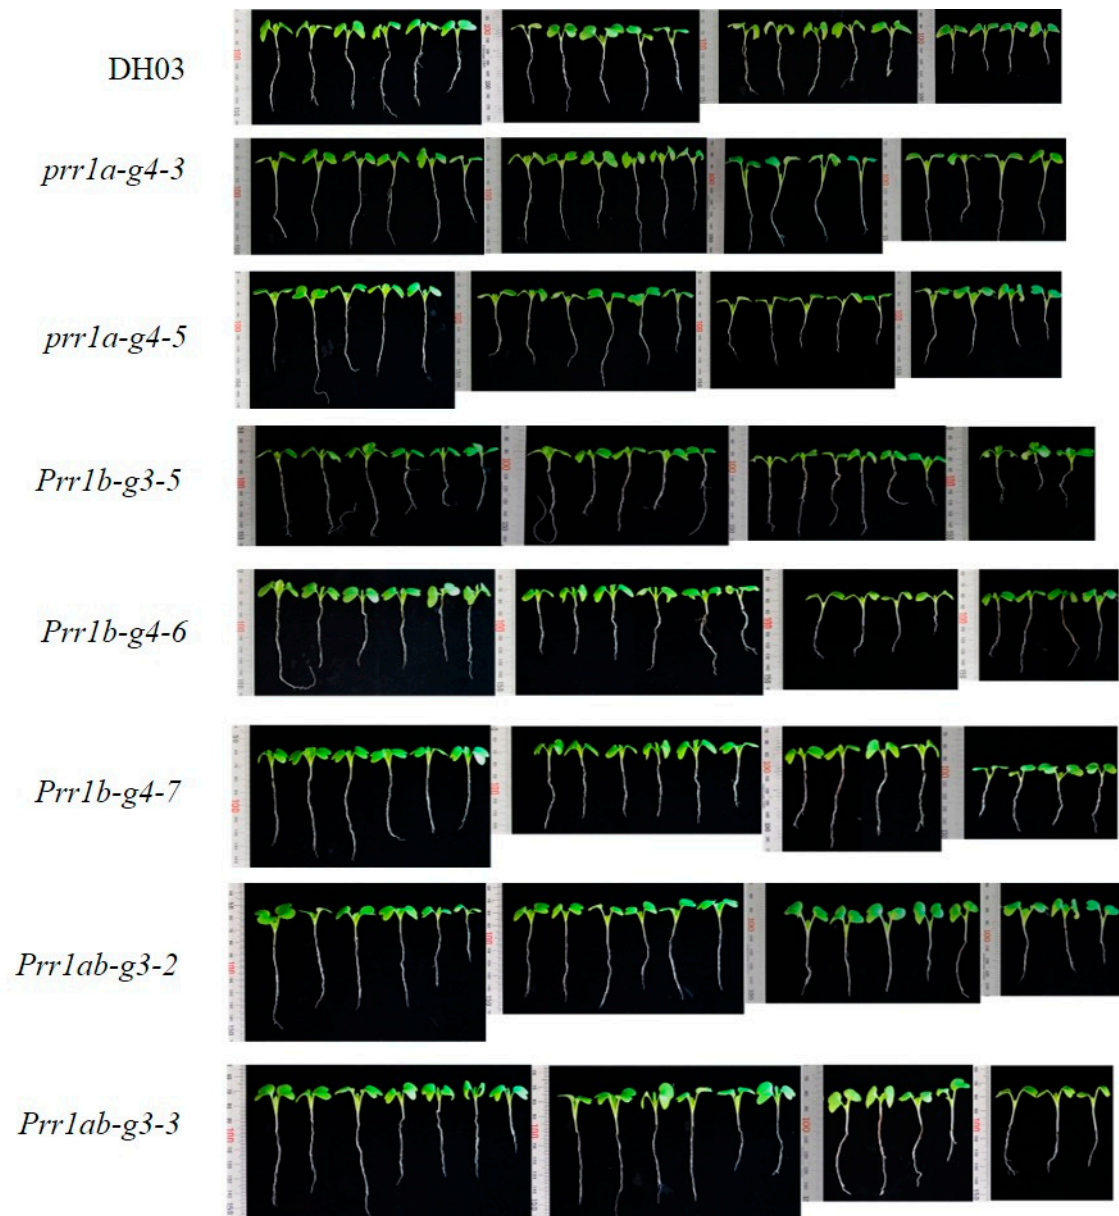

**Figure S6.** Phenotypes of 20 seedlings of BrPRR1a, BrPRR1b, and BrPRR1ab T<sub>1</sub> mutants in Chinese cabbage.

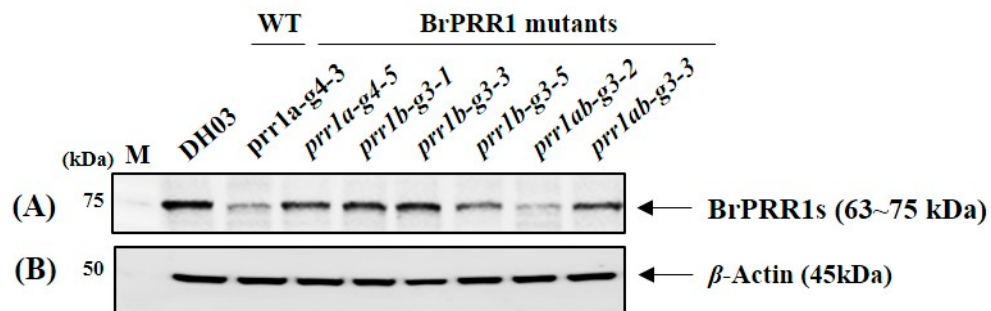

**Figure S7.** Protein expression of BrPRR1s in BrPRR1 mutants determined by Western blotting analysis. To determine the protein expression in BrPRR1a, BrPRR1b, and BrPRR1ab mutants, samples were collected at ZT12 with liquid nitrogen and at  $-80^{\circ}\text{C}$  prior to use.  $80\mu\text{g}$  of total protein extract was separated by 8% SDS-PAGE and electroblotted onto PVDF membranes. Primary and secondary antibody were used rabbit anti-TOC1 polyclonal antibody (Abiocode, Agoura hills, CA, USA) and goat anti-rabbit HRP conjugated antibody (A).  $\beta$ -actin was used for loading controls (B).
